# Supplementary material for: Whole-exome sequencing identifies a novel de novo mutation in DYNC1H1 in epileptic encephalopathies
Source: PubMed Central journal article supplement (PMC5428060; doi:10.1038/s41598-017-00208-6), 2017-03-21
Supplement: 41598_2017_208_MOESM1_ESM.pdf [file 41598_2017_208_MOESM1_ESM.pdf]

**Whole-exome sequencing identifies a novel *de novo* mutation in *DYNC1H1* in epileptic encephalopathies**

Zhongdong Lin<sup>1,3,†</sup>, Zhenwei Liu<sup>2,†</sup>, Xiucui Li<sup>3</sup>, Feng Li<sup>3</sup>, Ying Hu<sup>3</sup>, Bingyu Chen<sup>4</sup>,  
Zhen Wang<sup>4,\*</sup>, Yong Liu<sup>1,\*</sup>

<sup>1</sup>Institute of Neurobiology, Xi'an Jiaotong University Health Science Center, Xian, China

<sup>2</sup>Institute of Genomic Medicine, Wenzhou Medical University, Wenzhou, China

<sup>3</sup>Department of Pediatric Neurology, The Second Affiliated Hospital and Yuying Children's Hospital, Wenzhou Medical University, Wenzhou, China

<sup>4</sup>Research Center of Blood Transfusion Medicine, Key Laboratory of Laboratory Medicine, Ministry of Education, Zhejiang Provincial People's Hospital, Hangzhou, China

<sup>†</sup>These authors contributed equally to this work

\*Correspondence should be addressed to Zhen Wang ([yuchen6046@163.com](mailto:yuchen6046@163.com)) and Yong Liu ([liuy5599@mail.xjtu.edu.cn](mailto:liuy5599@mail.xjtu.edu.cn))

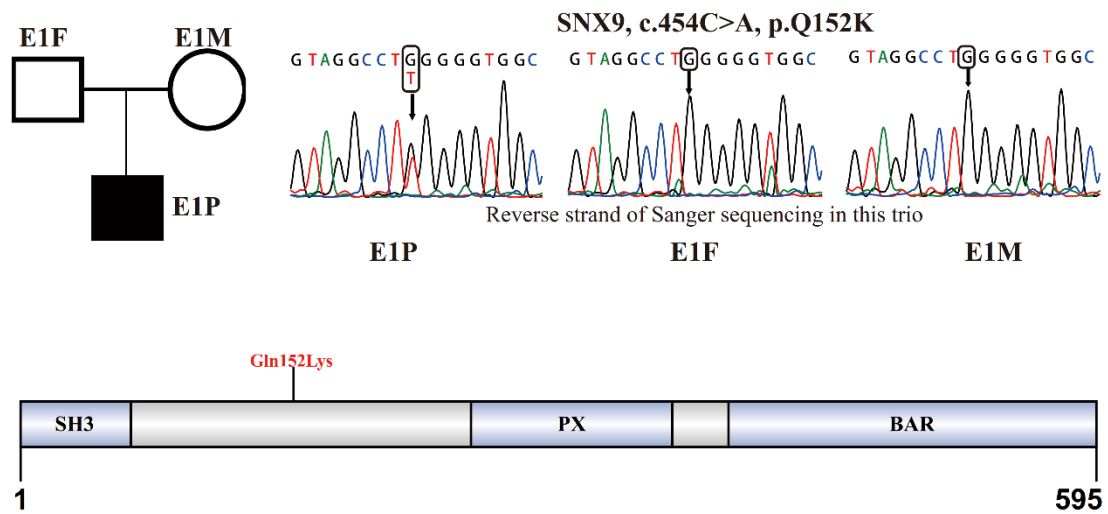

**Supplementary figure 1. *De novo* mutations identified in *SNX9*.** The *SNX9* variant (c.454C>A, p.Q152K) of trio E1 were confirmed using Sanger sequencing and Schematic representation of the *SNX9* protein

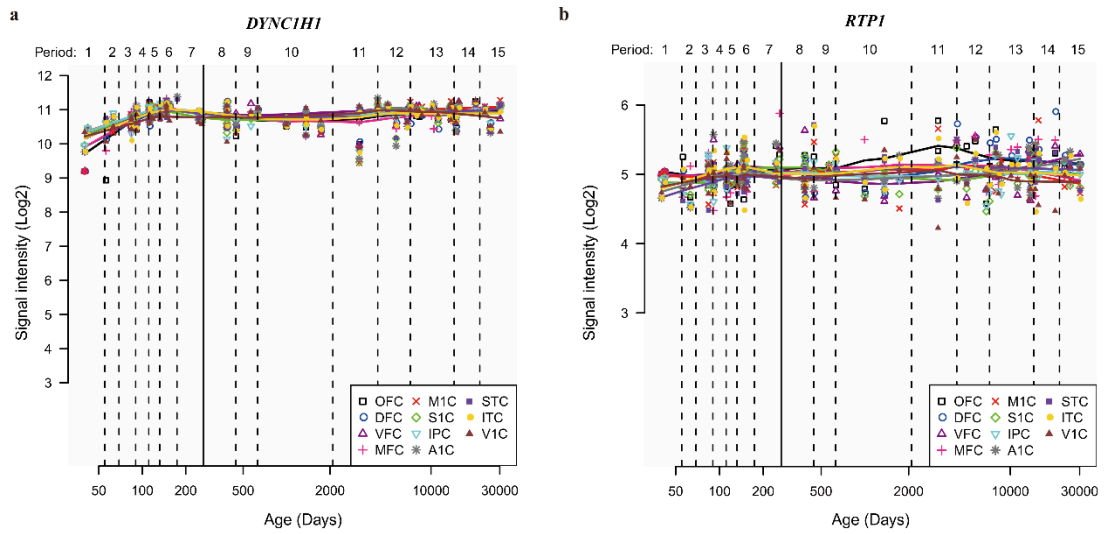

**Supplementary figure 2. Expression analysis of *DYNCH1* and *RTP1* in 11 areas of the neocortex (NCX).** OFC, orbital prefrontal cortex; DFC, dorsolateral prefrontal cortex; VFC, ventrolateral prefrontal cortex; MFC, medial prefrontal cortex; M1C, primary motor cortex; S1C, primary somatosensory cortex; IPC, posterior inferior parietal cortex; A1C, primary auditory cortex; STC, posterior superior temporal cortex; ITC, inferior temporal cortex; V1C, primary visual cortex.

**Supplemental Table 1. Summary of whole-exome sequencing data**

| <b>Sample</b> | <b>Clean data<br/>(Gb)</b> | <b>Initial bases<br/>on target<br/>(Mb)</b> | <b>Alignment<br/>rate (%)</b> | <b>Base<br/>covered on<br/>target(Mb)</b> | <b>Fraction of<br/>effective bases<br/>on target (%)</b> | <b>Average<br/>sequencing<br/>depth</b> | <b>4×<br/>coverage<br/>(%)</b> | <b>10×<br/>coverage<br/>(%)</b> | <b>20×<br/>coverage<br/>(%)</b> |
|---------------|----------------------------|---------------------------------------------|-------------------------------|-------------------------------------------|----------------------------------------------------------|-----------------------------------------|--------------------------------|---------------------------------|---------------------------------|
| E1F           | 3.18                       | 50.34                                       | 99.48                         | 49.06                                     | 56.60                                                    | 61.38                                   | 96.00                          | 92.40                           | 83.90                           |
| E1M           | 4.24                       | 50.34                                       | 99.61                         | 49.07                                     | 57.20                                                    | 84.35                                   | 96.40                          | 94.00                           | 88.70                           |
| E1P           | 3.09                       | 50.34                                       | 99.51                         | 49.03                                     | 57.40                                                    | 61.77                                   | 95.90                          | 92.10                           | 83.50                           |
| E2F           | 2.12                       | 50.34                                       | 99.48                         | 48.69                                     | 56.20                                                    | 41.01                                   | 93.60                          | 86.00                           | 71.30                           |
| E2M           | 3.72                       | 50.34                                       | 99.45                         | 48.68                                     | 55.30                                                    | 63.43                                   | 95.20                          | 91.10                           | 82.70                           |
| E2P           | 3.47                       | 50.34                                       | 99.49                         | 49.19                                     | 55.70                                                    | 66.51                                   | 96.20                          | 93.00                           | 85.30                           |
| E3F           | 3.92                       | 50.34                                       | 99.55                         | 48.98                                     | 58.00                                                    | 77.36                                   | 95.90                          | 92.70                           | 86.10                           |
| E3M           | 3.43                       | 50.34                                       | 99.52                         | 48.94                                     | 56.20                                                    | 65.95                                   | 95.70                          | 92.20                           | 84.30                           |
| E3P           | 4.72                       | 50.34                                       | 99.58                         | 48.99                                     | 56.70                                                    | 86.45                                   | 96.10                          | 93.30                           | 87.80                           |
| E4F           | 3.79                       | 50.34                                       | 99.51                         | 48.98                                     | 55.90                                                    | 69.27                                   | 96.00                          | 92.70                           | 85.50                           |
| E4M           | 4.30                       | 50.34                                       | 99.43                         | 48.77                                     | 55.70                                                    | 72.83                                   | 95.60                          | 92.40                           | 85.60                           |
| E4P           | 3.76                       | 50.34                                       | 99.42                         | 48.66                                     | 55.70                                                    | 63.76                                   | 95.20                          | 91.20                           | 83.00                           |
| <b>Mean</b>   | 3.78                       | 50.34                                       | 99.51                         | 48.93                                     | 56.38                                                    | 70.25                                   | 95.72                          | 92.15                           | 84.56                           |
| <b>SD</b>     | 0.67                       | 0.00                                        | 0.06                          | 0.18                                      | 0.79                                                     | 12.33                                   | 0.72                           | 1.93                            | 4.19                            |

**Supplemental Table 2. The evaluation of the tolerance of genes with de novo mutation in this study**

| <b>Trio</b> | <b>Gene</b>    | <b>Probability of HI</b> | <b>RVIS</b> | <b>RVIS Percentile</b> | <b>Z score for missense from ExAC</b> |
|-------------|----------------|--------------------------|-------------|------------------------|---------------------------------------|
| <b>E1</b>   | <i>SNX9</i>    | 0.143                    | -0.13       | 43.91%                 | 1.31                                  |
| <b>E2</b>   | <i>RTP1</i>    | 0.736                    | 0.06        | 58.84%                 | 0.76                                  |
| <b>E3</b>   | <i>DYNC1H1</i> | 0.436                    | -6.01       | 4.13%                  | 13.88                                 |

Not: HI, haploinsufficiency; RVIS, residual variation intolerance score; Lower RVIS percentiles and higher Z scores correspond to higher constraint

**Supplemental Table 3. PCR information for the validation of de novo mutation in this study**

| <b>Trio</b> | <b>Gene</b>    | <b>Mutation</b>      | <b>Primers (5'→ 3')</b>                                         | <b>Length(bp)</b> |
|-------------|----------------|----------------------|-----------------------------------------------------------------|-------------------|
| <b>E1</b>   | <i>SNX9</i>    | c.454C >A, p.Q152K   | Forword: CAACTGGGACACTGCCTTCG<br>Reverse: CTTCCCTGTCTCTCCCCTCAG | 110               |
| <b>E2</b>   | <i>RTP1</i>    | c.323T>A, p.I108N    | Forword: AGTGCACCAAGCGCATTTT<br>Reverse: GGCCCAACCACGGAATCTTA   | 858               |
| <b>E3</b>   | <i>DYNC1H1</i> | c.10174A>G, p.M3392V | Forword: TCAGTCACTGGGGCAATGAG<br>Reverse: AAGAGGTCACCTTTCACACGG | 279               |
